# Supplementary material for: Polypeptide induced perylene probe excimer formation and its application in the noncovalent ratiometric detection of matrix metalloproteinase activity
Source: Royal Society of Chemistry journal article supplement (doi:10.1039/d2tb00416j), 2022-01-01
Supplement: d2tb00416j1.pdf [file d2tb00416j1.pdf]

## Supporting Information

### **Polypeptide induced perylene probe excimer formation and its application for the noncovalent ratiometric detection of matrix metalloproteinase activity**

Xiaoyu Gou<sup>a</sup>, Muhammad Azhar Hayat Nawaz<sup>b,c,d</sup>, Chaoyi Liu<sup>b</sup>, Na Yang<sup>b</sup>, Jia Ren<sup>b</sup>,  
Huipeng Zhou<sup>b</sup>, Yunhui Li<sup>a,e\*</sup>, Jianwei Zhu<sup>e\*</sup>, Wenzhao Han<sup>b\*</sup>, Cong Yu<sup>b,c\*</sup>

<sup>a</sup>School of Chemistry and Environmental Engineering, Changchun University of Science and Technology, Changchun 130022, China

<sup>b</sup>State Key Laboratory of Electroanalytical Chemistry, Changchun Institute of Applied Chemistry, Chinese Academy of Sciences, Changchun 130022, China

<sup>c</sup>University of Science and Technology of China, Hefei 230026, China

<sup>d</sup>Interdisciplinary Research Centre in Biomedical Materials (IRCBM), COMSATS University, Islamabad, Lahore Campus, Lahore, 54000, Pakistan

<sup>e</sup>Zhongshan Institute of Changchun University of Science and Technology, Zhongshan, 528400, China

## **Experimental**

### **1.1 Measurements**

<sup>1</sup>H NMR spectra were obtained using a Bruker AVANCE 400 Fourier transform (400 MHz) NMR spectrometer. Absorption spectra were obtained using a Cary 50 Bio Spectrophotometer (Varian Inc., CA., USA). Fluorescence spectral changes were recorded using a fluoromax-4 spectrometer (Horiba Jobin Yvon Inc., USA). The fluorescence spectra were tested at room temperature of 25 °C with a cuvette optical length of 10 mm, if not otherwise specified. The excitation wavelength for fluorescence detection was 495 nm and the slit for both excitation and emission was 6 nm. The emission spectra were corrected against photomultiplier tube (PMT) response. For brevity, the emission spectra were normalized ( $I_{545}$  value =1).

The vacuum drying oven was purchased from Jinghong Experimental Equipment Co., Ltd. (Shanghai, China). Ultrasonic Cleaner was purchased from Ultrasonic Instruments Co., Ltd. (Kunshan, Shanghai). The electric thermostatic water tank was purchased from Yiheng Technology Co., Ltd. (Shanghai, China). The analytical balance and pH meter were purchased from Sartorius Scientific Instruments Co., Ltd. (Beijing, China). Sterilization pot was purchased from Boxun Industrial & Commerce Co., Ltd., Medical Equipment Factory (Shanghai, China). The filter was purchased from Pall Filter Co., Ltd. (Beijing, China). The centrifuge was purchased from Scilogex Co., Ltd. (USA). Pipette guns were purchased from Thermo Fisher Scientific Co., Ltd. (Shanghai, China). Ultrapure water preparation instrument was a Milli-Q

A10 filtration system (Millipore, Billerica, MA, USA). Storage and buffer solutions used for testing were filtered and sterilized (120 °C, 20 min).

## **1.2 MMP Activation**

The buffer used for the activation of all recombinant human MMPs in the present work was 50 mM Tris, 10 mM CaCl<sub>2</sub>, 150 mM NaCl, 0.05% (w/v) Brij-35, pH 7.5 (TCNB buffer). 1 µg/mL of MMP-1 was activated by APMA at a final concentration of 1 mM in a water bath for 2 h and then frozen for storage. 1 µg/mL of MMP-2 was activated by APMA at a final concentration of 1 mM in a water bath at 37 °C for 1 h and then frozen for storage; 10 µg/mL of MMP-3 was activated by 5 µg/mL of α-chymotrypsin in a water bath at 37 °C water for 30 min. Next, the activation was terminated by adding PMSF at a final concentration of 2 mM, and then frozen for storage; 1 µg/mL of MMP-7 was activated by APMA at a final concentration of 1 mM in a water bath at 37 °C for 1 h, and then frozen for storage; 1 µg/mL of MMP-9 was activated by APMA at a final concentration of 1 mM in a water bath at 37 °C for 24 h, and then frozen for storage. 1 µg/mL of MMP-13 was activated by APMA at a final concentration of 1 mM in a water bath at 37 °C for 2 h and then frozen for storage.

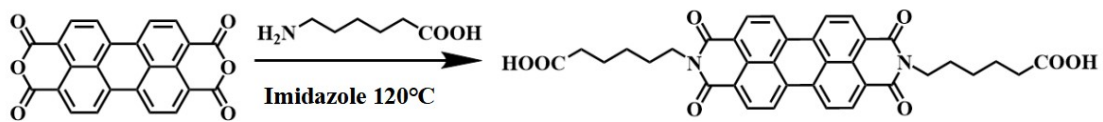

**Figure S1.** Schematic diagram of PC1 synthesis.

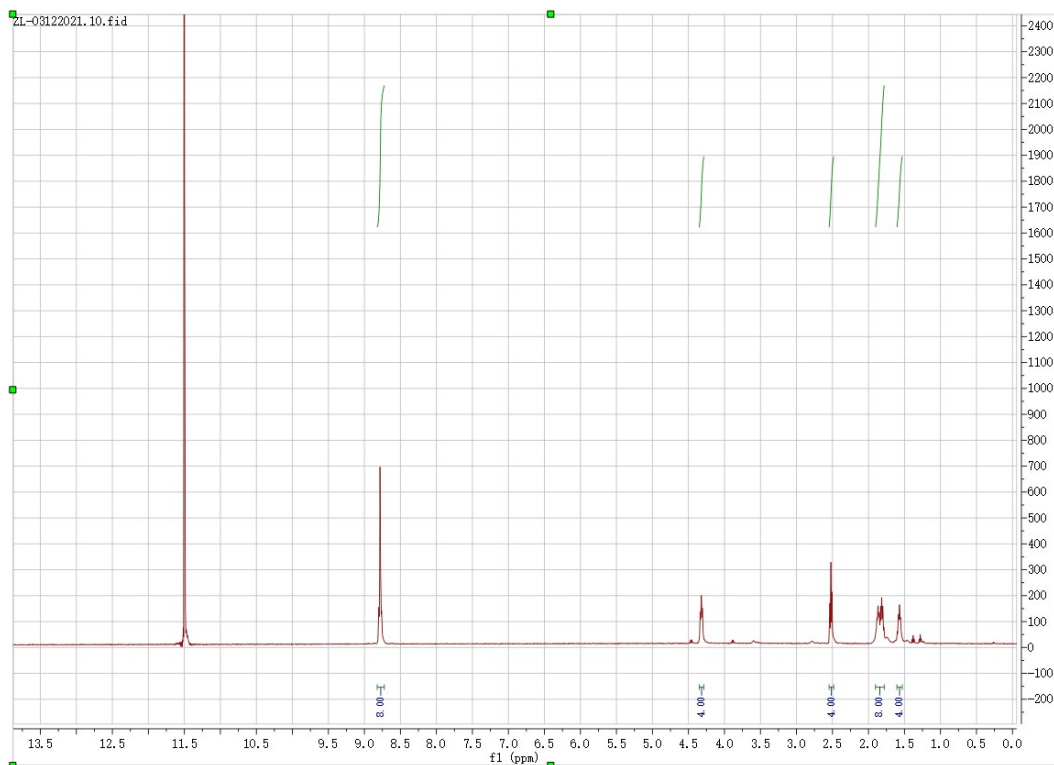

**Figure S2.**  $^1\text{H-NMR}$  spectra of PC1.

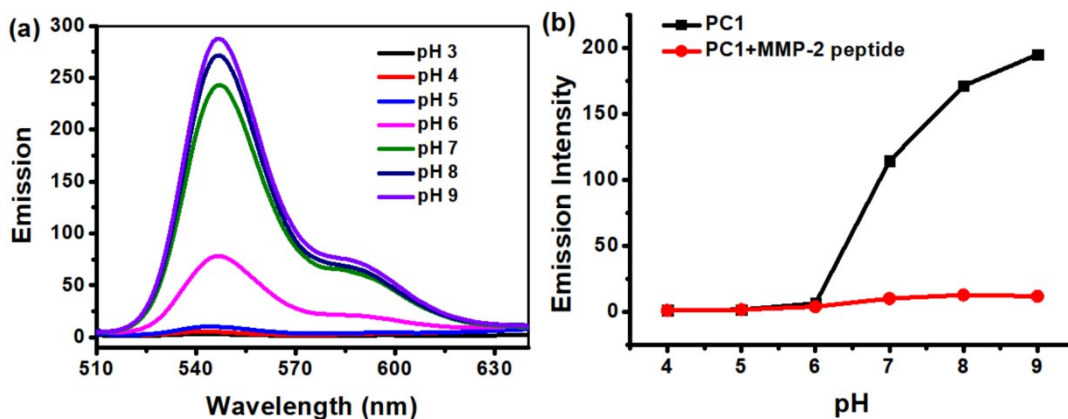

**Figure S3.** (a) Emission intensity changes of PC1 (10 μM) with assay solution pH. (b)

Scatter plot of  $I_{545}$  value of 10 μM PC1 with assay solution pH in the presence and absence of 2.5 μM MMP-2 peptide substrate.

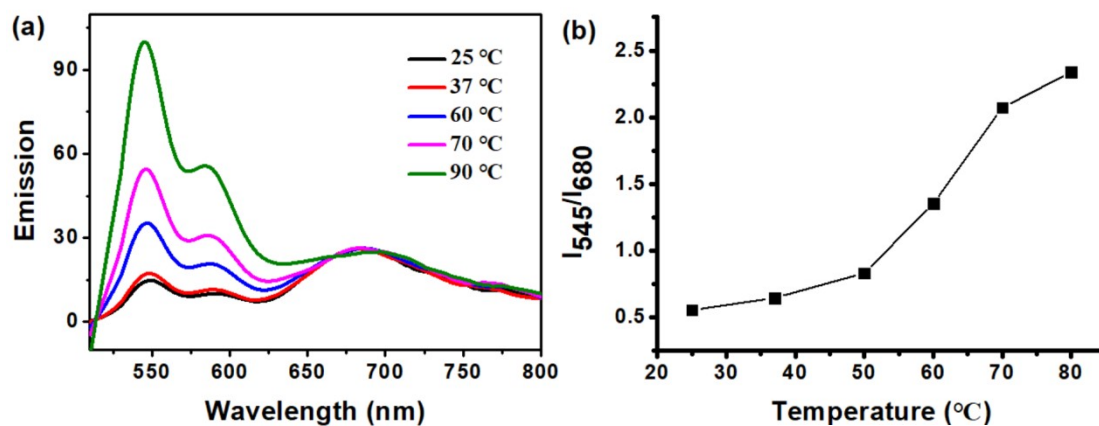

**Figure S4.** (a) Emission intensity changes of PC1 (10 μM) with assay solution temperature in the presence of 2.5 μM MMP-2 peptide substrate. (b) Scatter plot of  $I_{545}/I_{680}$  value of 10 μM PC1 with assay solution temperature in the presence of 2.5 μM MMP-2 peptide substrate.

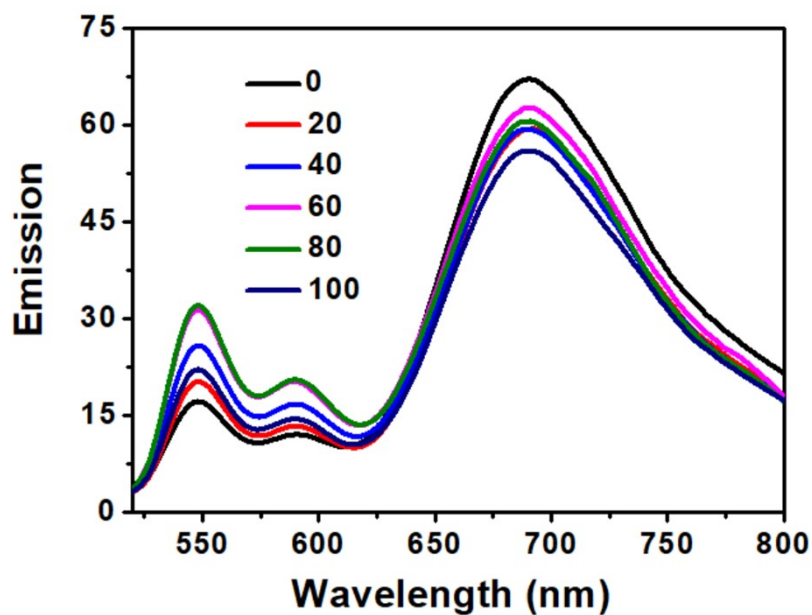

**Figure S5.** Emission intensity changes of PC1 (10  $\mu\text{M}$ ) with assay solution NaCl concentrations (mM) in the presence of 2.5  $\mu\text{M}$  MMP-2 peptide substrate.

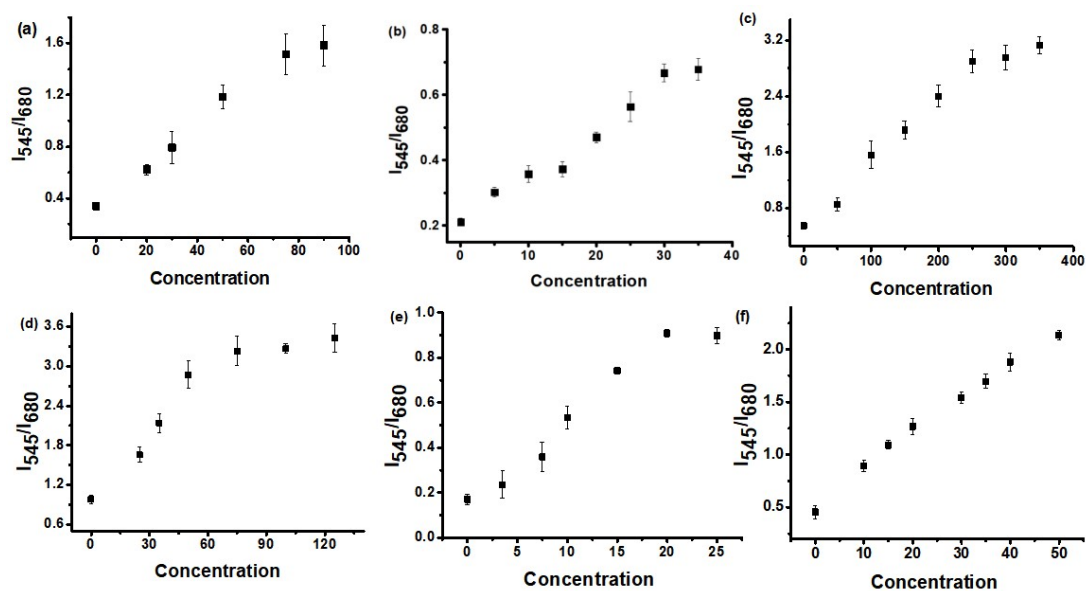

**Figure S6.** Scatter plot of the  $I_{545}/I_{680}$  value changes after adding different concentrations of MMP (in ng/mL). (a) MMP-1, (b) MMP-2, (c) MMP-3, (d) MMP-7, (e) MMP-9 and (f) MMP-13.

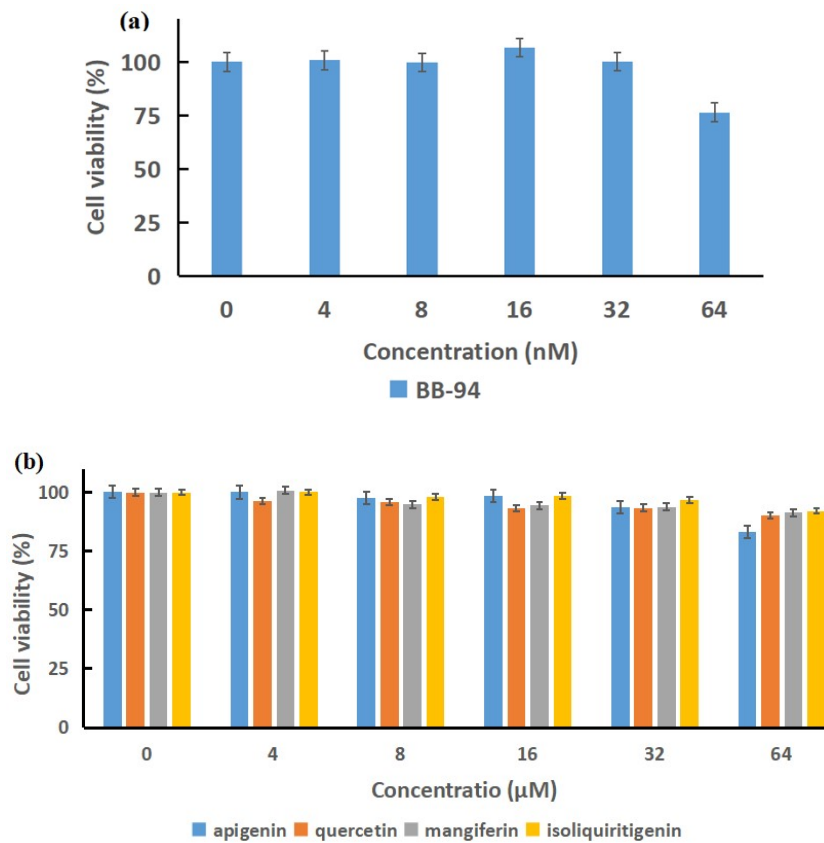

**Figure S7.** Toxicity of different concentrations of drugs on HT-1080 cells. (a) BB-94

(b) blue for apigenin, orange for quercetin, gray for mangiferin, yellow for isoliquiritigenin.

**Table S1.** Concentrations of peptide substrate and MMP in the MMP activity assay.

| <b>MMP</b> | <b>Peptide substrate concentration (<math>\mu\text{M}</math>)</b> | <b>MMP concentration (ng/mL)</b>        |
|------------|-------------------------------------------------------------------|-----------------------------------------|
| MMP-1      | 1.5                                                               | 0, 20, 30, 40, 50, 60, 80, 90, 100, 120 |
| MMP-2      | 2.75                                                              | 0, 5, 10, 15, 20, 25, 30, 35            |
| MMP-3      | 2.0                                                               | 0, 50, 100, 150, 200, 250, 300, 350     |
| MMP-7      | 1.5                                                               | 0, 25, 35, 50, 75, 100, 125             |
| MMP-9      | 2.5                                                               | 0, 3.5, 7.5, 10, 15, 20, 25             |
| MMP-13     | 2.5                                                               | 0, 10, 15, 20, 30, 35, 40, 50           |



**Table S2.** The limit of detection (LOD) and linear range of MMPs activity based on monomer/excimer ratio fluorometric method.

| MMP    | LOD, ng/mL | Linear range, ng/mL | Linear regression equation (and R <sup>2</sup> value) |
|--------|------------|---------------------|-------------------------------------------------------|
| MMP-1  | 4.8        | 20 – 100            | $I_{545}/I_{680} = 0.016 C + 0.33$ (0.99)             |
| MMP-2  | 2.2        | 5.0 – 30            | $I_{545}/I_{680} = 0.014 C + 0.21$ (0.98)             |
| MMP-3  | 16.0       | 50 – 250            | $I_{545}/I_{680} = 0.0093 C + 0.52$ (0.99)            |
| MMP-7  | 6.0        | 25 – 75             | $I_{545}/I_{680} = 0.032 C + 0.97$ (0.97)             |
| MMP-9  | 1.7        | 4.0 – 20            | $I_{545}/I_{680} = 0.038 C + 0.16$ (0.99)             |
| MMP-13 | 5.5        | 10 – 40             | $I_{545}/I_{680} = 0.034 C + 0.54$ (0.99)             |

\* 'C' stands for the concentration of MMP in ng/mL.

**Table S3.** Assay performance of reported biosensors for determination of MMP activities (NA: not available).

| Target | Sensing platform                   | Transduction Type | Detection Limit | Detection range         | Ref.      |
|--------|------------------------------------|-------------------|-----------------|-------------------------|-----------|
| MMP-3  | Gold array                         | SPR               | NA              | 50 ng/mL -20 $\mu$ g/mL | S1        |
| MMP-7  | AuNP-JR2EC                         | Colorimetry       | 0.1 $\mu$ g/mL  | 0 - 2 $\mu$ g/mL        | S2        |
| MMP-7  | AuNP-Pep-QDs                       | Fluorescence      | 10 ng/mL        | 10 ng/mL - 5 $\mu$ g/mL | S3        |
| MMP-7  | UCP-Pep-FITC                       | Fluorescence      | 13.9 ng/mL      | 0.01 -1 $\mu$ g/mL      | S4        |
| MMP-7  | rGO-peptide                        | Electrochemistry  | 10 ng/mL        | 10 ng/mL - 1 $\mu$ g/mL | S5        |
| MMP-7  | Carboxy AuNPs                      | Colorimetry       | 0.28 $\mu$ g/mL | 0.084 - 1.46 $\mu$ g/mL | S6        |
| MMP-7  | AuNPs/BCTOT-Eu <sup>III</sup> /AMC | Fluorescence      | 1.1 ng/mL       | 0.04 - 0.4 $\mu$ g/mL   | S7        |
| MMP-3  | Perylene probe                     | Fluorescence      | 6 ng/mL         | 50 - 250 ng/mL          | This Work |
| MMP-7  |                                    |                   | 16 ng/mL        | 25 -75 ng/mL            |           |

## References

- S1. S. H. Jung, D. H. Kong, J. H. Park, S. T. Lee, J. Hyun, Y. M. Kim and K. S. Ha, *Analyst*, 2010, **135**, 1050-1057.
- S2. P. Chen, R. Selegård, D. Aili and B. Liedberg, *Nanoscale*, 2013, **5**, 8973-8976.
- S3. S. Y. Park, S. M. Lee, G. B. Kim and Y.-P. Kim, *Gold Bulletin*, 2012, **45**, 213-219.
- S4. S. Cao, Z. Li, J. Zhao, M. Chen and N. Ma, *ACS Sensors*, 2018, **3**, 1522-1530.
- S5. H. Chen, P. Chen, J. Huang, R. Selegård, M. Platt, A. Palaniappan, D. Aili, A. I. Y. Tok and B. Liedberg, *Anal. Chem.*, 2016, **88**, 2994-2998.
- S6. G. B. Kim, K. H. Kim, Y. H. Park, S. Ko and Y.-P. Kim, *Biosensors and Bioelectronics*, 2013, **41**, 833-839.
- S7. X. Wang, Y. Xia, Y. Liu, W. Qi, Q. Sun, Q. Zhao and B. Tang, *Chemistry – A European Journal*, 2012, **18**, 7189-7195.
